# Supplementary material
Source: ML conference proceedings conference paper supplement (https://openaccess.thecvf.com/content/CVPR2024/html/Slyman_FairDeDup_Detecting_and_CVPR_2024_paper.html)
Supplement: Supplementary file 1 [file Slyman_FairDeDup_Detecting_and_CVPR_2024_supplemental.pdf]

# FairDeDup: Detecting and Mitigating Vision-Language Fairness Disparities in Semantic Dataset Deduplication

## Supplementary Material

### 1. Bias Constrained Clusters

As described in Sec. 6, clustering may limit the availability of lower represented samples for biasing sensitive concept representation. We show several demonstrative clusters in Fig. 1 alongside descriptions of possible limitations.

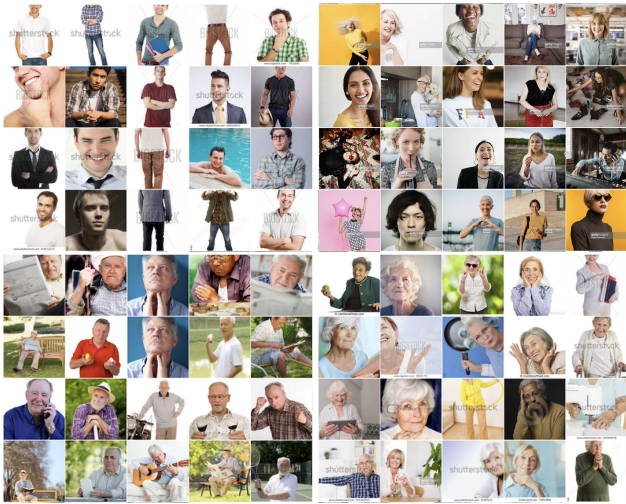

(a) Stock close-ups bifurcated across gender presentation and age.

Figure 1. Sample Clusters where selecting for certain underrepresented concepts may be difficult due to them being split into an entirely different cluster.

### 2. Hyperparameters

| Parameter     | Value                      |
|---------------|----------------------------|
| Model         | CLIP                       |
| Image Encoder | Vision Transformer Base/16 |
| Text Encoder  | Text Transformer           |
| Epochs        | 16                         |
| Batch Size    | 33,820                     |
| Learning Rate | $5 \times 10^{-4}$         |
| LR Warmup     | Linear / 2,000 Batches     |
| LR Schedule   | Cosine Annealing           |
| Optimizer     | AdamW                      |
| $Decay$       | 0.2                        |
| $\beta_1$     | 0.90                       |
| $\beta_2$     | 0.98                       |
| $\epsilon$    | $1 \times 10^{-6}$         |
| Precision     | AMP BFloat16               |

Table 1. Hyperparameters used to train all models.

### 3. Choosing Sensitive Concepts

We derive sensitive concepts based on commonly protected groups in law. For example, Title VII of the US Civil Rights Act prohibits employment discrimination based on groups like *race* and *religion*. We take the intersection of commonly protected groups and those which are annotated in VL fairness datasets (*e.g.*, only *race* from above) to inform our concept design. In this way, we are able to consider concepts relevant to real-world practice while retaining our ability to evaluate the effectiveness of our mitigation strategy in a lab setting. To represent intersectional identities, we specifically choose sensitive concepts which simultaneously capture many of these protected groups.

## 4. Sensitive Concept Prototypes

|                               |                                  |
|-------------------------------|----------------------------------|
| 1 person                      | 56 young white woman             |
| 2 woman                       | 57 young white man               |
| 3 man                         | 58 young indian person           |
| 4 black person                | 59 young indian woman            |
| 5 black woman                 | 60 young indian man              |
| 6 black man                   | 61 young latino person           |
| 7 white person                | 62 young latino woman            |
| 8 white woman                 | 63 young latino man              |
| 9 white man                   | 64 young east asian person       |
| 10 indian person              | 65 young east asian woman        |
| 11 indian woman               | 66 young east asian man          |
| 12 indian man                 | 67 young middle eastern person   |
| 13 latino person              | 68 young middle eastern woman    |
| 14 latino woman               | 69 young middle eastern man      |
| 15 latino man                 | 70 young southeast asian person  |
| 16 east asian person          | 71 young southeast asian woman   |
| 17 east asian woman           | 72 young southeast asian man     |
| 18 east asian man             | 73 child                         |
| 19 middle eastern person      | 74 black child                   |
| 20 middle eastern woman       | 75 white child                   |
| 21 middle eastern man         | 76 indian child                  |
| 22 southeast asian person     | 77 latino child                  |
| 23 southeast asian woman      | 78 east asian child              |
| 24 southeast asian man        | 79 middle eastern child          |
| 25 old person                 | 80 southeast asian child         |
| 26 old woman                  | 81 baby                          |
| 27 old man                    | 82 black baby                    |
| 28 old black person           | 83 white baby                    |
| 29 old black woman            | 84 indian baby                   |
| 30 old black man              | 85 latino baby                   |
| 31 old white person           | 86 east asian baby               |
| 32 old white woman            | 87 middle eastern baby           |
| 33 old white man              | 88 southeast asian baby          |
| 34 old indian person          | 89 boy                           |
| 35 old indian woman           | 90 girl                          |
| 36 old indian man             | 91 black boy                     |
| 37 old latino person          | 92 black girl                    |
| 38 old latino woman           | 93 white boy                     |
| 39 old latino man             | 94 white girl                    |
| 40 old east asian person      | 95 indian boy                    |
| 41 old east asian woman       | 96 indian girl                   |
| 42 old east asian man         | 97 latino boy                    |
| 43 old middle eastern person  | 98 latino girl                   |
| 44 old middle eastern woman   | 99 east asian boy                |
| 45 old middle eastern man     | 100 east asian girl              |
| 46 old southeast asian person | 101 middle eastern boy           |
| 47 old southeast asian woman  | 102 middle eastern girl          |
| 48 old southeast asian man    | 103 southeast asian boy          |
| 49 young person               | 104 southeast asian girl         |
| 50 young woman                | 105 person with dark skin        |
| 51 young man                  | 106 person with light skin       |
| 52 young black person         | 107 old person with dark skin    |
| 53 young black woman          | 108 old person with light skin   |
| 54 young black man            | 109 young person with dark skin  |
| 55 young white person         | 110 young person with light skin |

(a) Sensitive Concepts

|                                  |
|----------------------------------|
| 1 A photo of a {concept}         |
| 2 This is a photo of a {concept} |
| 3 A {concept}                    |

(b) Text Templates

Figure 2. Sensitive concepts and templates used to generate text concept prototypes for FairDeDup in Sec 3.

## 5. Deduplicated Cluster Examples

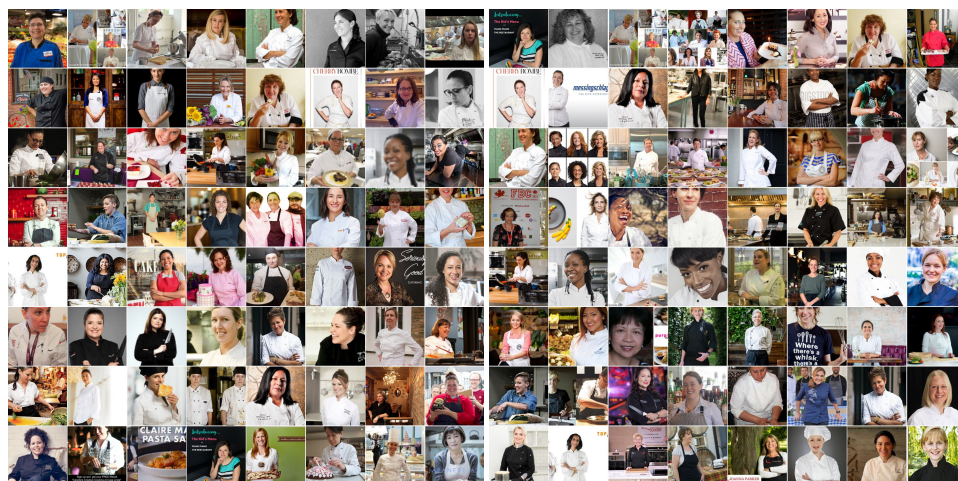

(a) Chef

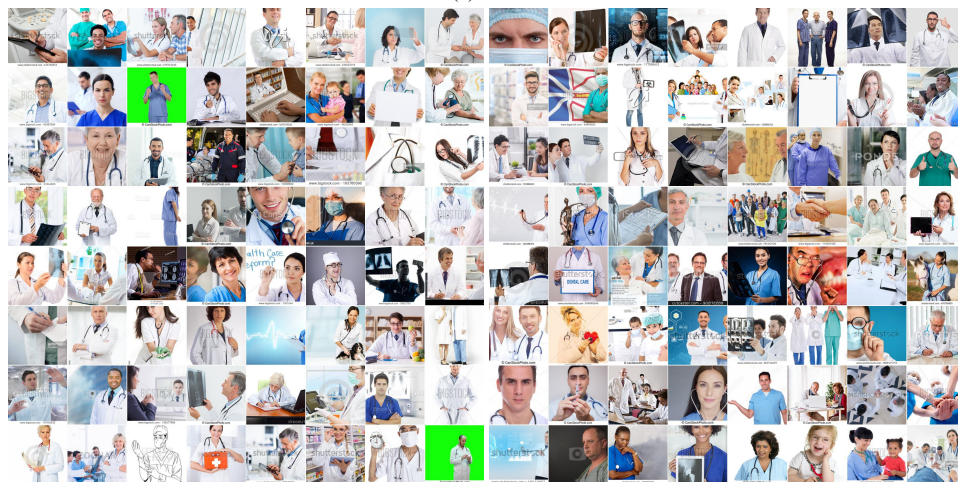

(b) Doctor

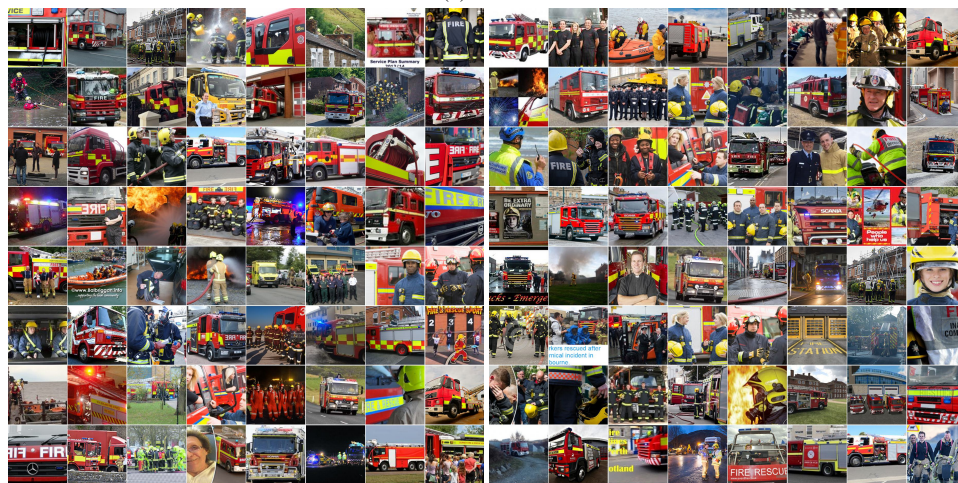

(c) Firefighter

Figure 3. Additional samples from person-related clusters after applying **SemDeDup** (left) and **FairDeDup** (right). Samples are randomly selected from clusters manually identified to include people. We annotate each cluster with our identification of its semantic contents.

## 6. Additional Datasets and Metrics

|               |       | <b>Full Data</b><br>(100%) | <b>SemDeDup</b><br>(50%) | <b>FairDeDup</b><br>(50%) |
|---------------|-------|----------------------------|--------------------------|---------------------------|
| <b>-a</b>     | Acc@1 | .2947                      | .3096                    | .2988                     |
|               | Acc@5 | .6247                      | .6359                    | .6271                     |
|               | MPCR  | .3163                      | .3228                    | .3126                     |
| <b>-o</b>     | Acc@1 | .5060                      | .5365                    | .5360                     |
|               | Acc@5 | .8235                      | .8420                    | .8385                     |
|               | MPCR  | .5213                      | .5501                    | .5443                     |
| <b>-r</b>     | Acc@1 | .7646                      | .7652                    | .7534                     |
|               | Acc@5 | .9249                      | .9245                    | .9223                     |
|               | MPCR  | .7512                      | .7506                    | .7386                     |
| <b>1k</b>     | Acc@1 | .6640                      | .6579                    | .6535                     |
|               | Acc@5 | .8993                      | .8974                    | .8970                     |
|               | MPCR  | .6639                      | .6578                    | .6536                     |
| <b>sketch</b> | Acc@1 | .5142                      | .5036                    | .4989                     |
|               | Acc@5 | .7803                      | .7774                    | .7724                     |
|               | MPCR  | .5144                      | .5040                    | .4993                     |
| <b>v2</b>     | Acc@1 | .5821                      | .5776                    | .5747                     |
|               | Acc@5 | .8453                      | .8413                    | .8368                     |
|               | MPCR  | .5822                      | .5774                    | .5747                     |

Table 2. Zero-shot classification performance on ImageNet variants from CLIP Benchmark. Mean Per Class Recall abbreviated as MPCR. Higher is better for all metrics.

|                  |           | <b>Full Data</b><br>(100%) | <b>SemDeDup</b><br>(50%) | <b>FairDeDup</b><br>(50%) |
|------------------|-----------|----------------------------|--------------------------|---------------------------|
| <b>flickr30k</b> | Image R@5 | .8728                      | .8736                    | .8714                     |
|                  | Text R@5  | .9640                      | .9670                    | .9620                     |
| <b>flickr8k</b>  | Image R@5 | .8570                      | .8592                    | .8574                     |
|                  | Text R@5  | .9450                      | .9400                    | .9300                     |
| <b>coco</b>      | Image R@5 | .6325                      | .6318                    | .6255                     |
|                  | Text R@5  | .7852                      | .7882                    | .7810                     |

Table 3. Image-text (Image R@5) and text-image (Text R@5) retrieval Recall@5 on Flickr and COCO from CLIP Benchmark. Higher is better for all metrics.

|                                |       | <b>Full Data</b><br>(100%) | <b>SemDeDup</b><br>(50%) | <b>FairDeDup</b><br>(50%) |
|--------------------------------|-------|----------------------------|--------------------------|---------------------------|
| <b>cars</b>                    | Acc@1 | .8526                      | .8346                    | .8429                     |
|                                | Acc@5 | .9923                      | .9909                    | .9922                     |
|                                | MPCR  | .8541                      | .8344                    | .8429                     |
| <b>country<sub>211</sub></b>   | Acc@1 | .1791                      | .1742                    | .1685                     |
|                                | Acc@5 | .3978                      | .3950                    | .3889                     |
|                                | MPCR  | .1789                      | .1740                    | .1683                     |
| <b>fer<sub>2013</sub></b>      | Acc@1 | .3976                      | .3969                    | .4809                     |
|                                | Acc@5 | .9358                      | .9115                    | .9413                     |
|                                | MPCR  | .4057                      | .3702                    | .4152                     |
| <b>fgvc<sub>aircraft</sub></b> | Acc@1 | .1563                      | .1497                    | .1665                     |
|                                | Acc@5 | .4164                      | .4146                    | .4212                     |
|                                | MPCR  | .1545                      | .1495                    | .1667                     |
| <b>gtsrb</b>                   | Acc@1 | .4159                      | .4101                    | .3383                     |
|                                | Acc@5 | .7352                      | .6814                    | .7062                     |
|                                | MPCR  | .3884                      | .3806                    | .3571                     |
| <b>mnist<sub>mnist</sub></b>   | Acc@1 | .3896                      | .5474                    | .5890                     |
|                                | Acc@5 | .8064                      | .8022                    | .9058                     |
|                                | MPCR  | .3938                      | .5531                    | .5911                     |
| <b>objectnet</b>               | Acc@1 | .4722                      | .4754                    | .4781                     |
|                                | Acc@5 | .7296                      | .7283                    | .7311                     |
|                                | MPCR  | .4614                      | .4681                    | .4665                     |
| <b>render<sub>sst2</sub></b>   | Acc@1 | .5371                      | .5157                    | .5041                     |
|                                | MPCR  | .5368                      | .5155                    | .5036                     |
| <b>stl10</b>                   | Acc@1 | .9659                      | .9705                    | .9686                     |
|                                | Acc@5 | .9996                      | .9998                    | .9995                     |
|                                | MPCR  | .9659                      | .9708                    | .9684                     |
| <b>sun397</b>                  | Acc@1 | .6856                      | .6786                    | .6838                     |
|                                | Acc@5 | .9344                      | .9351                    | .9363                     |
|                                | MPCR  | .6730                      | .6613                    | .6662                     |
| <b>voc2007</b>                 | Acc@1 | .7432                      | .7617                    | .7584                     |
|                                | Acc@5 | .9498                      | .9518                    | .9515                     |
|                                | MPCR  | .8197                      | .8297                    | .8286                     |

Table 4. Additional zero-shot classification results from CLIP Benchmark. Mean Per Class Recall abbreviated as MPCR. Higher is better for all metrics.



|                                  |       | Full Data<br>(100%) | SemDeDup<br>(50%) | FairDeDup<br>(50%) |
|----------------------------------|-------|---------------------|-------------------|--------------------|
| <b>caltech</b><br>101            | Acc@1 | .8304               | .8230             | .8309              |
|                                  | Acc@5 | .9399               | .9394             | .9578              |
|                                  | MPCR  | .9193               | .9035             | .9061              |
| <b>cifar</b><br>10               | Acc@1 | .9198               | .9255             | .9203              |
|                                  | Acc@5 | .9986               | .9984             | .9992              |
|                                  | MPCR  | .9198               | .9254             | .9204              |
| <b>cifar</b><br>100              | Acc@1 | .7234               | .7291             | .7299              |
|                                  | Acc@5 | .9342               | .9342             | .9386              |
|                                  | MPCR  | .7231               | .7289             | .7303              |
| <b>clevr</b><br>obj dist         | Acc@1 | .2033               | .2101             | .2232              |
|                                  | Acc@5 | .9187               | .9187             | .9187              |
|                                  | MPCR  | .1686               | .1633             | .1673              |
| <b>clevr</b><br>count.all        | Acc@1 | .1421               | .2317             | .1916              |
|                                  | Acc@5 | .6474               | .8174             | .6397              |
|                                  | MPCR  | .1397               | .2264             | .1873              |
| <b>diabetic</b>                  | Acc@1 | .0646               | .3209             | .0666              |
|                                  | Acc@5 | 1.0000              | 1.0000            | 1.0000             |
|                                  | MPCR  | .2178               | .1998             | .2029              |
| <b>dmlab</b>                     | Acc@1 | .1949               | .1692             | .1960              |
|                                  | Acc@5 | .8430               | .8236             | .8270              |
|                                  | MPCR  | .1677               | .1869             | .1569              |
| <b>dsprites</b><br>label orient. | Acc@1 | .0226               | .0272             | .0244              |
|                                  | Acc@5 | .1259               | .1264             | .1302              |
|                                  | MPCR  | .0231               | .0276             | .0249              |
| <b>dsprites</b><br>label xpos    | Acc@1 | .0305               | .0315             | .0305              |
|                                  | Acc@5 | .1600               | .1568             | .1625              |
|                                  | MPCR  | .0313               | .0321             | .0312              |
| <b>dsprites</b><br>label ypos    | Acc@1 | .0315               | .0317             | .0317              |
|                                  | Acc@5 | .1553               | .1559             | .1596              |
|                                  | MPCR  | .0311               | .0312             | .0312              |

Table 5. Zero-shot classification performance on Visual Task Adaptation Benchmark (VTAB) datasets from CLIP Benchmark. Mean Per Class Recall abbreviated as MPCR. Higher is better for all metrics.

|                                     |       | Full Data<br>(100%) | SemDeDup<br>(50%) | FairDeDup<br>(50%) |
|-------------------------------------|-------|---------------------|-------------------|--------------------|
| <b>dtd</b>                          | Acc@1 | .5330               | .5021             | .5074              |
|                                     | Acc@5 | .8293               | .7883             | .8202              |
|                                     | MPCR  | .5330               | .5011             | .5080              |
| <b>eurosat</b>                      | Acc@1 | .4904               | .5220             | .5246              |
|                                     | Acc@5 | .9335               | .9289             | .8987              |
|                                     | MPCR  | .5117               | .5288             | .5404              |
| <b>flowers</b>                      | Acc@1 | .6723               | .6536             | .6878              |
|                                     | Acc@5 | .8533               | .8442             | .8374              |
|                                     | MPCR  | .6657               | .6384             | .6509              |
| <b>kitti</b><br>dist.               | Acc@1 | .1589               | .1505             | .2363              |
|                                     | MPCR  | .2134               | .1707             | .2134              |
| <b>pcam</b>                         | Acc@1 | .5521               | .4720             | .5910              |
|                                     | MPCR  | .5521               | .4719             | .5909              |
| <b>pets</b>                         | Acc@1 | .8929               | .8577             | .8812              |
|                                     | Acc@5 | .9951               | .9940             | .9937              |
|                                     | MPCR  | .8917               | .8570             | .8802              |
| <b>resisc</b><br>45                 | Acc@1 | .5694               | .5892             | .5763              |
|                                     | Acc@5 | .8889               | .8938             | .8914              |
|                                     | MPCR  | .5751               | .5955             | .5853              |
| <b>smallnorb</b><br>label azimuth   | Acc@1 | .0539               | .0502             | .0550              |
|                                     | Acc@5 | .2796               | .2781             | .2738              |
|                                     | MPCR  | .0547               | .0509             | .0560              |
| <b>smallnorb</b><br>label elevation | Acc@1 | .0927               | .1125             | .1114              |
|                                     | Acc@5 | .5319               | .5770             | .5544              |
|                                     | MPCR  | .0922               | .1116             | .1106              |
| <b>svhn</b>                         | Acc@1 | .3973               | .3657             | .4008              |
|                                     | Acc@5 | .7782               | .7694             | .8107              |
|                                     | MPCR  | .3727               | .3670             | .3238              |

Table 6. Additional results for VTAB extending Tab. 5.

## 7. Extended Pseudo-Code

```
1 def semdedup(embs, eps):
2     # Sort by distance to the cluster centroid.
3     sort_by_dist_to_centroid(embs, desc=True)
4
5     # Compute the pairwise cosine similarity
6     pair_sims = embs @ embs.T
7     triu_sims = torch.triu(pair_sims, diagonal=1)
8     M = torch.max(triu_sim_matrix, dim=0)[0]
9
10    # Keep if the max similarity <= threshold
11    points = M <= 1 - epsilon
12    log_and_keep(points)
13
14 def fairdedup(embs, prototypes, eps):
15     # Get similarity with concept prototypes
16     proto = embs @ prototypes.T
17
18     balance = AverageMeter(proto.shape[0])
19     tovisit = torch.ones(embs.shape[0])
20     while tovisit.any():
21         # Find an unvisited neighborhood
22         node = torch.where(tovisit)[0][0]
23         sims = embs[node] @ embs.T
24         neighbors = torch.where(sims > 1 - eps)
25         neighbors = neighbors[0]
26
27         # Maximize least represented concept
28         c = balance.get_min_concept()
29         point = proto[neighbors][:, c].argmax()
30         balance.update(point)
31
32         log_and_keep(point)
33         tovisit[neighbors] = 0
34
35 # Input: embedding_model, dataset, eps,
36         prototypes
37 # Embed and cluster the dataset
38 embeddings = embedding_model(dataset)
39 per_cluster_embeddings = kmeans(embeddings)
40 for cluster in per_cluster_embeddings:
41     # Choose selection method
42     semdedup(cluster)
43     fairdedup(cluster)
```

Figure 4. Extended PyTorch-style pseudo-code for SemDeDup and FairDeDup selection given concept prototypes, an embedding\_model, target dataset to deduplicate, and an eps similarity threshold for determining duplicates. SemDeDup pseudo-code modified from the original paper.
